# Supplementary material for: A template-directed synthesis of metal–organic framework (MOF-74) ultrathin nanosheets for oxygen reduction electrocatalysis
Source: Royal Society of Chemistry journal article supplement (doi:10.1039/d0ra09973b), 2021-01-01

Template-Directed Synthesis of Metal-Organic Framework (MOF-74) Ultrathin  
Nanosheets for Oxygen Reduction Electrocatalysis

**Contents:**

1. Figure S1. The XRD patterns of LDH template.
2. Figure S2. The SEM image of LDH template.
3. Figure S3. The SEM image of Ni-MOF-74 nanosheets.
4. Figure S4. The TEM image of Ni-MOF-74 nanosheets.
5. Figure S5. The CV curves of bulk Ni-MOF-74.
6. Figure S6. The CV curves of Ni-MOF-74 nanosheets.
7. Figure S7. The CV curves of Ni-MOF-74/AB-1 sample.
8. Figure S8. The CV curves of 20% Pt/C catalyst.
9. Figure S9. The EIS curves of various Ni-MOF-74 samples.
10. Figure S10. Currents of 20% Pt/C catalyst with different rotating speeds.

1. Figure S1. The XRD patterns of LDH template.

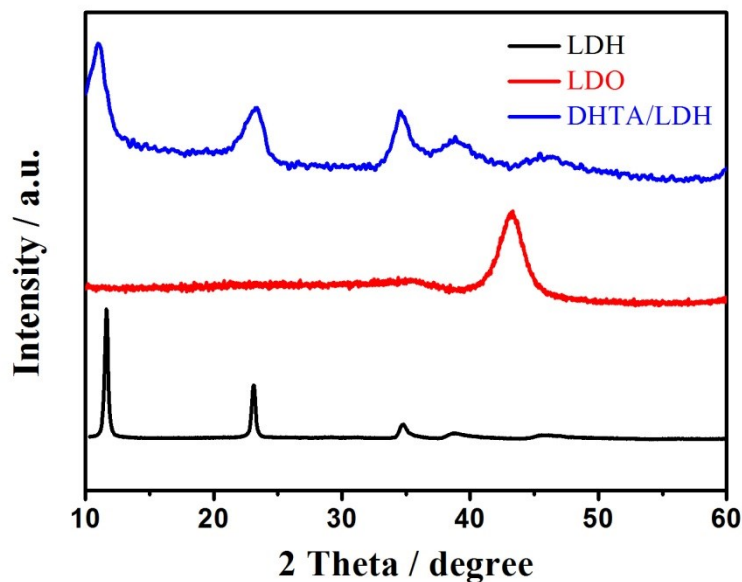

2. Figure S2. The SEM image of LDH template.

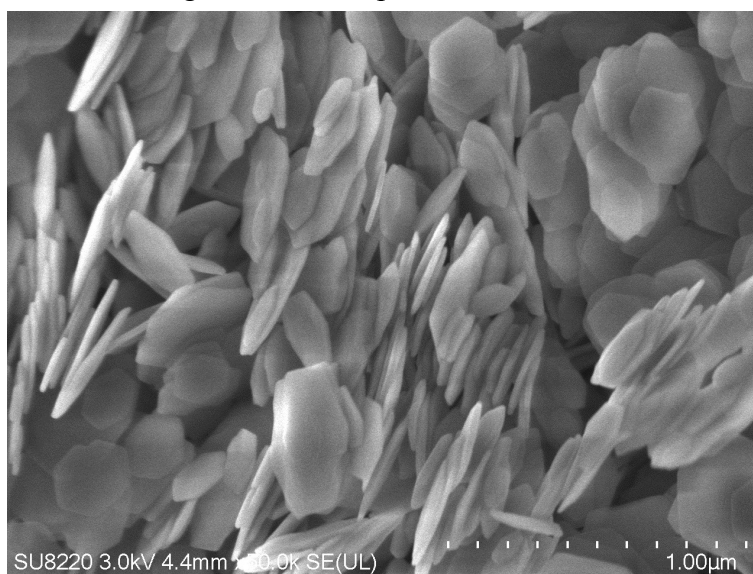

3. Figure S3. The SEM image of Ni-MOF-74 nanosheets.

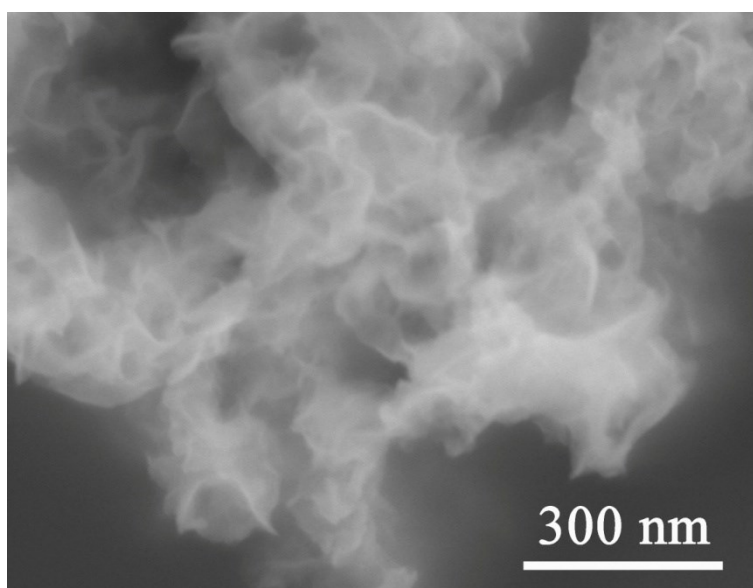

4. Figure S4. The TEM image of Ni-MOF-74 nansheets.

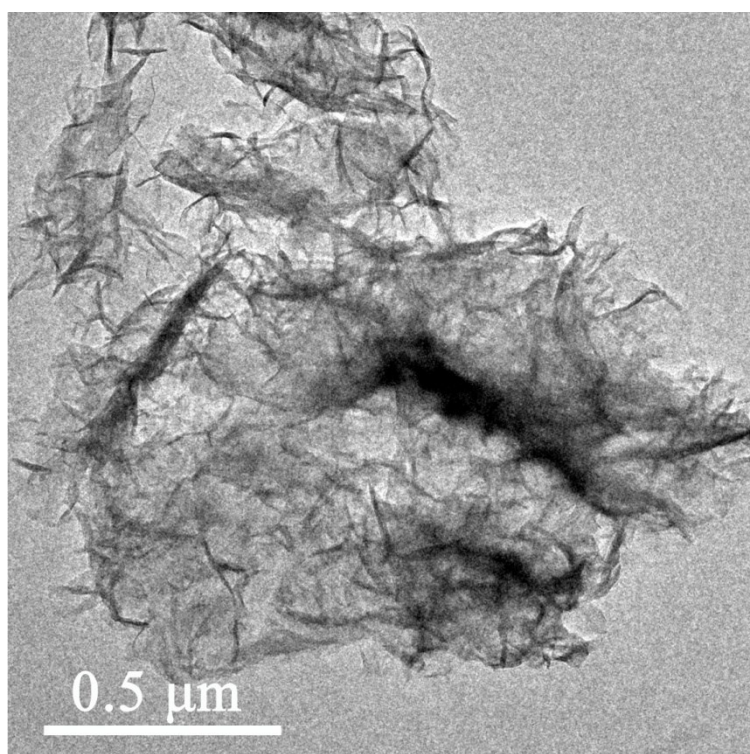

5. Figure S5. The CV curves of bulk Ni-MOF-74.

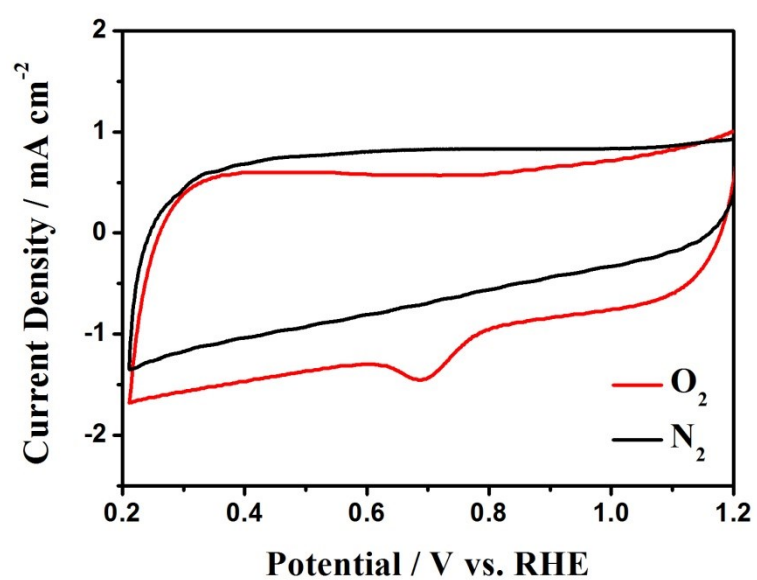

6. Figure S6. The CV curves of Ni-MOF-74 nanosheets.

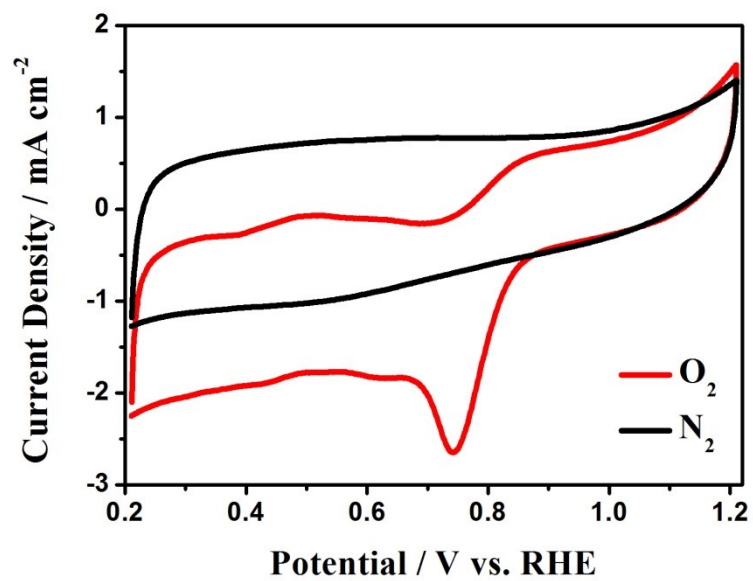

7. Figure S7. The CV curves of Ni-MOF-74/AB sample.

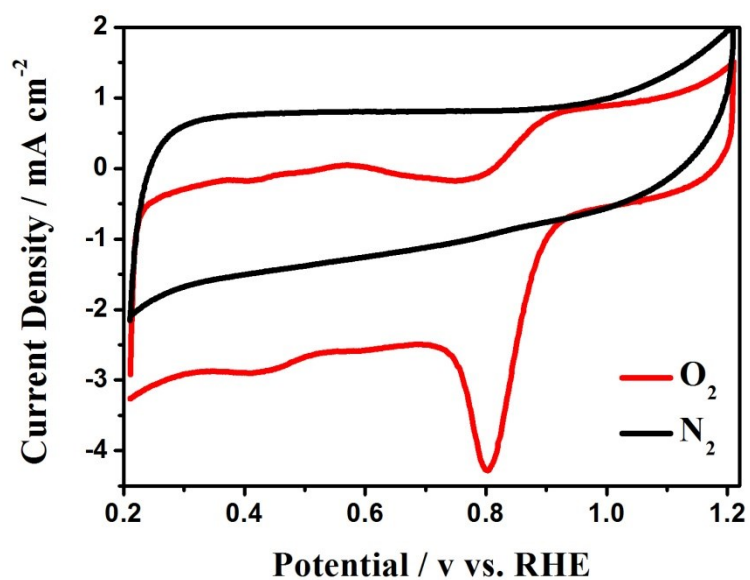

8. Figure S8. The CV curves of 20% Pt/C catalyst.

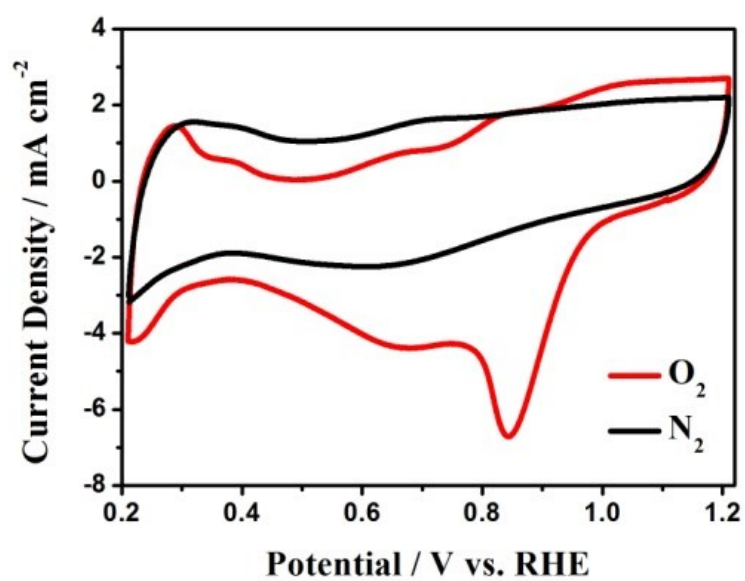

9. Figure S9. EIS curves of various Ni-MOF-74 samples.

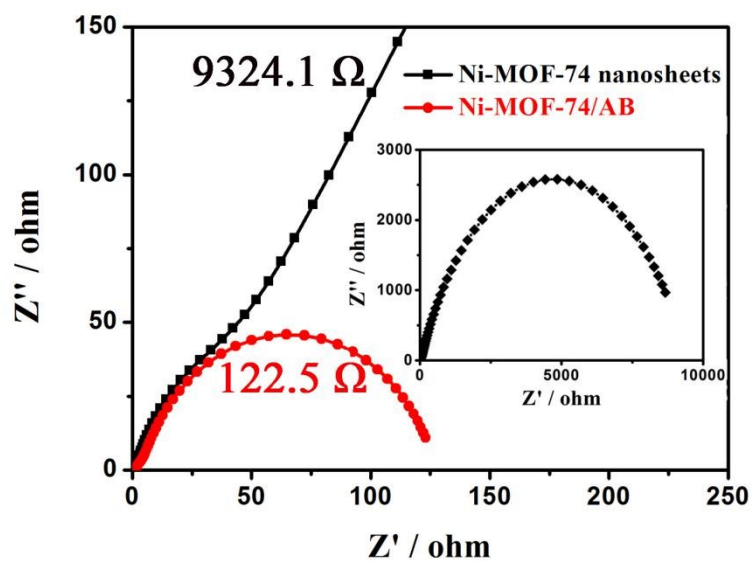

10. Figure S10. Currents of 20% Pt/C catalyst with different rotating speeds.

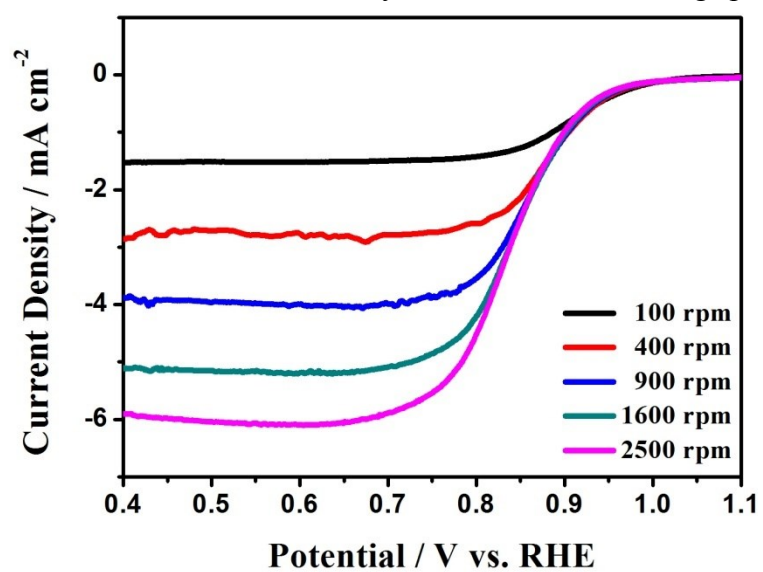

Supplement: d0ra09973b1.pdf [file d0ra09973b1.pdf]
